# Supplementary material for: Prognostic Value of Biochemical Response Models for Primary Biliary Cholangitis and the Additional Role of the Neutrophil-to-Lymphocyte Ratio
Source: PubMed Central journal article supplement — Gut Liver. 2018 Oct 29;12(6):714–21. doi: 10.5009/gnl18271 (PMC6254625; doi:10.5009/gnl18271), 2018-10-29
Supplement: gnl-12-714_suppl.pdf [file gnl-12-714_suppl.pdf]

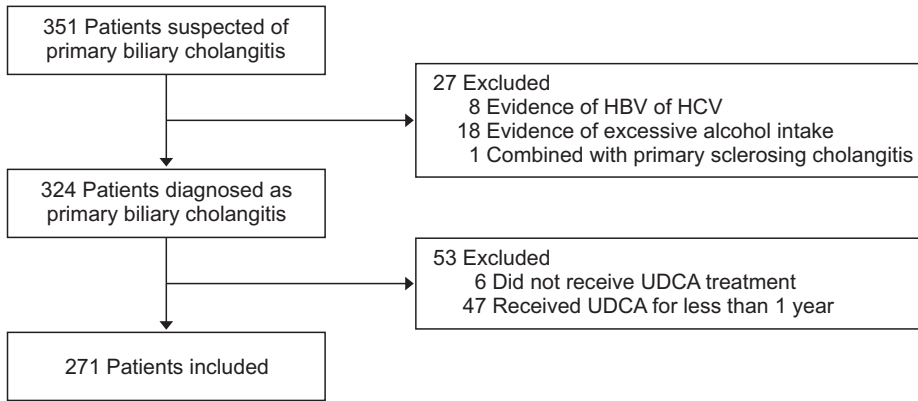

**Supplementary Fig. 1.** CONSORT diagram for enrolled patients. HBV, hepatitis B virus; HCV, hepatitis C virus; UDCA, ursodeoxycholic acid.

**Supplementary Table 1.** Reference Ranges for Laboratory Values

| Parameter (mL/min/1.73 m <sup>2</sup> ) | SNUH    | SCH     |
|-----------------------------------------|---------|---------|
| Platelet, 10 <sup>9</sup> /L            | 130–400 | 150–450 |
| Total bilirubin, mg/dL                  | 0.2–1.2 | 0.2–1.2 |
| Alkaline phosphatase, IU/L              | 30–115  | 20–140  |
| Aspartate aminotransferase, IU/L        | 1–40    | 5–40    |
| Alanine aminotransferase, IU/L          | 1–40    | 0–40    |
| Albumin, g/dL                           | 3.3–5.2 | 3.3–5.2 |

SNUH, Seoul National University Hospital; SCH, Soonchunhyang University Hospital.

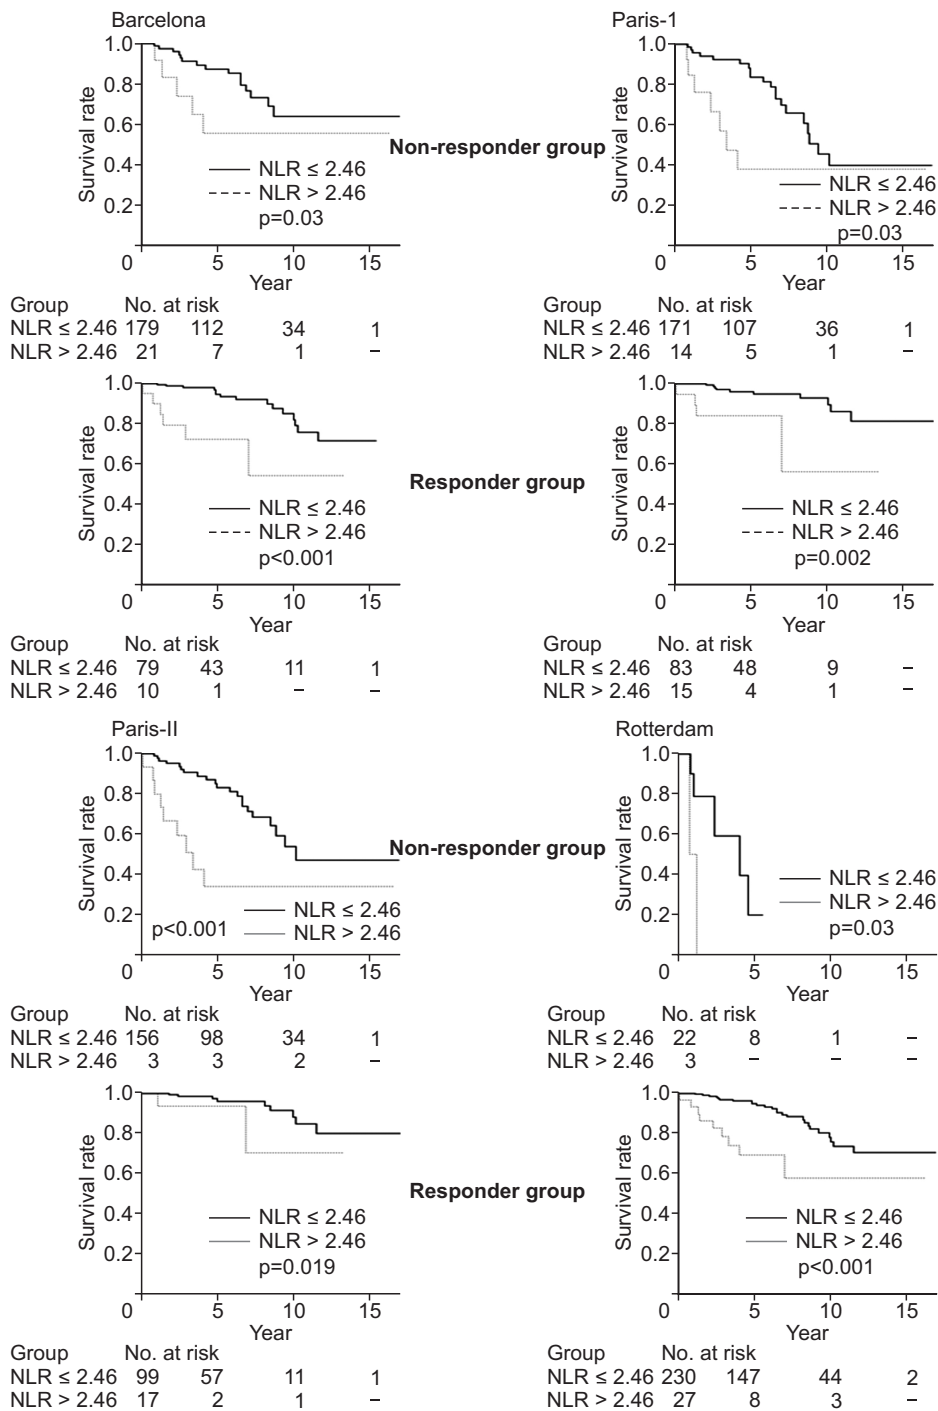

**Supplementary Fig. 2.** The impact of neutrophil-to-lymphocyte ratio (NLR) on prognosis in the low and high-risk groups in all six models. \*The high versus low group classification of UK-PBC was based on the median score. High group was classified as greater than median, and low group was classified as lower than median.

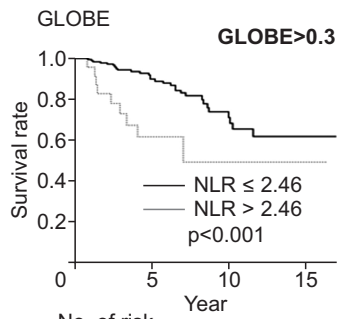

| Group      | No. of risk |     |    |    |
|------------|-------------|-----|----|----|
| NLR ≤ 2.46 | 320         | 198 | 72 | 10 |
| NLR > 2.46 | 24          | 9   | 1  | -  |

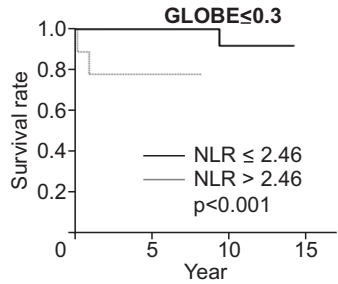

| Group      | No. of risk |   |   |   |
|------------|-------------|---|---|---|
| NLR ≤ 2.46 | 6           | 3 | - | - |
| NLR > 2.46 | 5           | - | - | - |

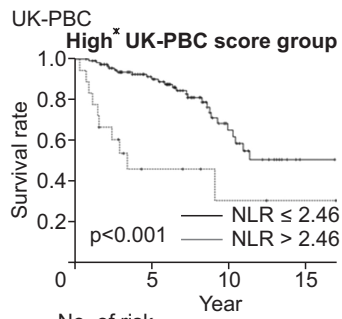

| Group      | No. of risk |     |    |   |
|------------|-------------|-----|----|---|
| NLR ≤ 2.46 | 197         | 118 | 38 | 3 |
| NLR > 2.46 | 25          | 8   | 1  | - |

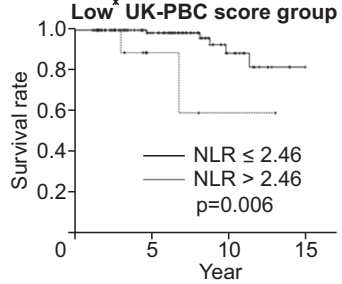

| Group      | No. of risk |    |    |   |
|------------|-------------|----|----|---|
| NLR ≤ 2.46 | 130         | 84 | 34 | 7 |
| NLR > 2.46 | 1           | 1  | -  | - |

**Supplementary Fig. 2.** Continued.
